# Supplementary material for: HIF prolyl hydroxylase PHD3 regulates translational machinery and glucose metabolism in clear cell renal cell carcinoma
Source: PubMed Central journal article supplement (PMC5496173; doi:10.1186/s40170-017-0167-y), 2017-07-04

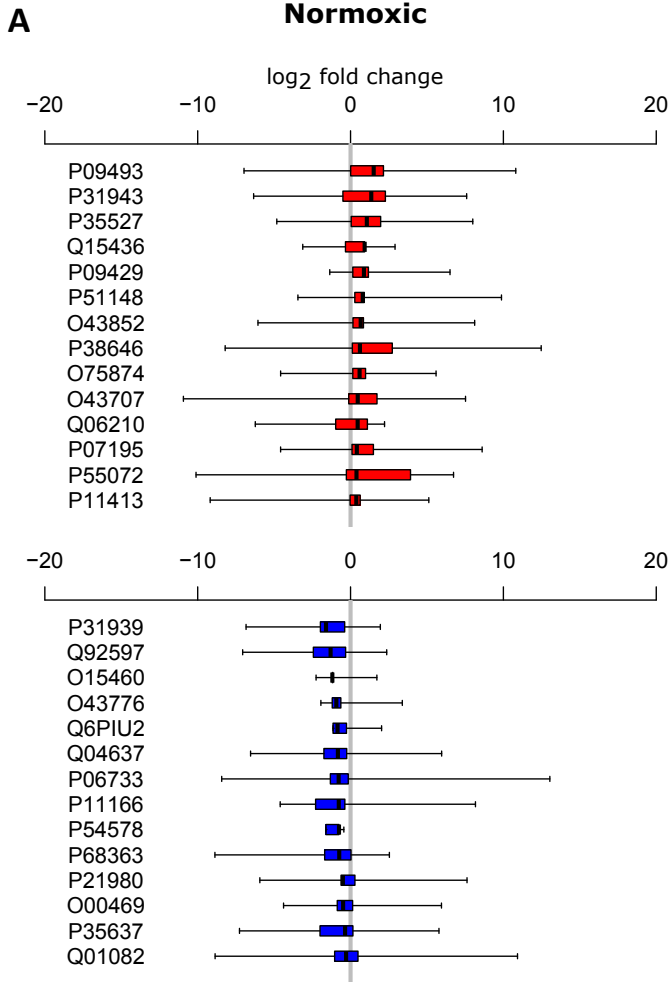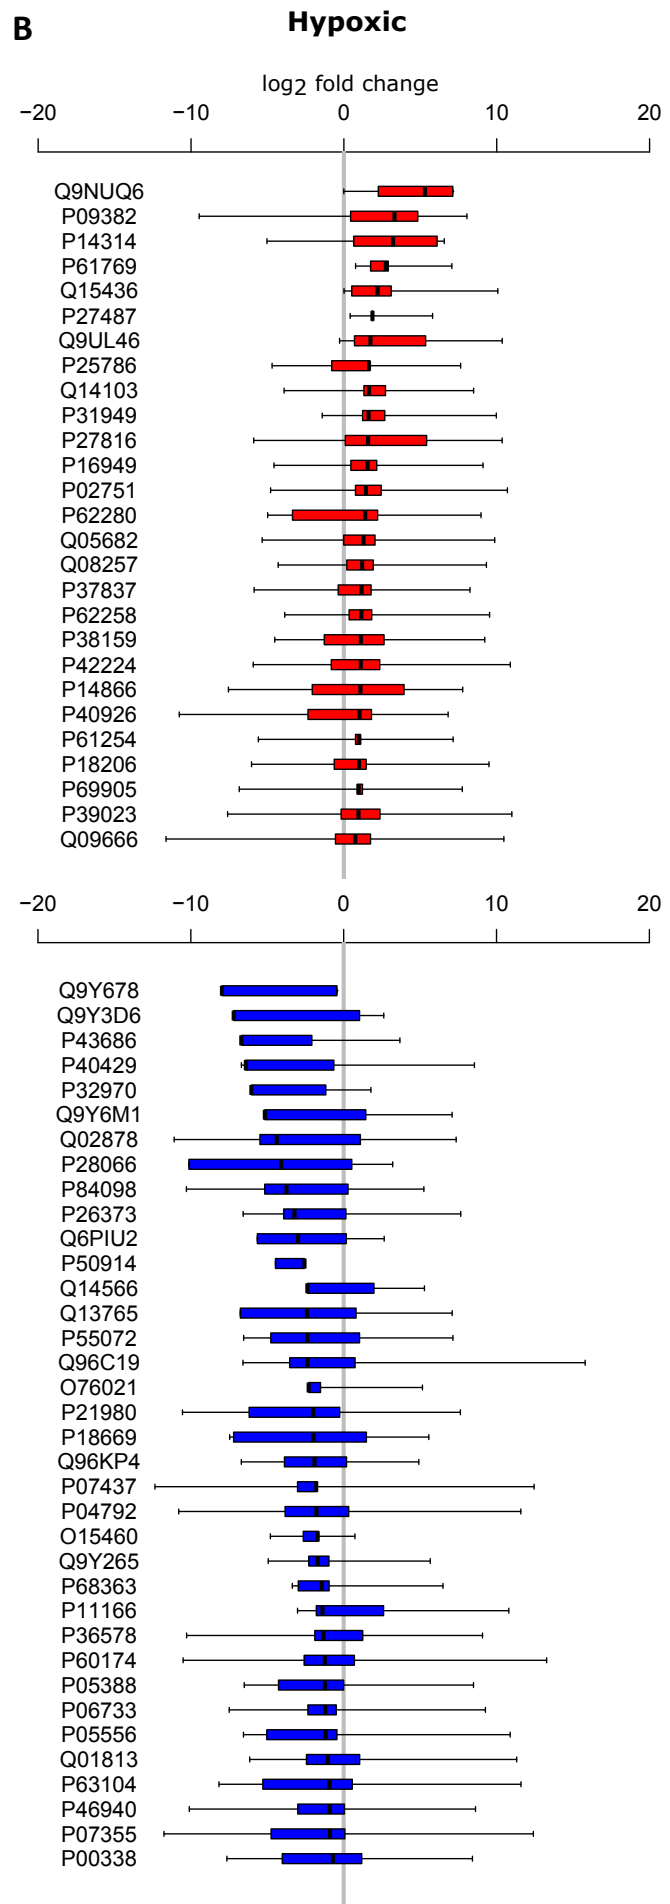

Supplement: 40170_2017_167_MOESM1_ESM.pdf [file 40170_2017_167_MOESM1_ESM.pdf]
