# Supplementary material for: HIF prolyl hydroxylase PHD3 regulates translational machinery and glucose metabolism in clear cell renal cell carcinoma
Source: PubMed Central journal article supplement (PMC5496173; doi:10.1186/s40170-017-0167-y), 2017-07-04
Supplement: 40170_2017_167_MOESM2_ESM.pdf [file 40170_2017_167_MOESM2_ESM.pdf]

| BINGO GO Biological Process - Upregulated                                                                         | Corr p-value |
|-------------------------------------------------------------------------------------------------------------------|--------------|
| <b>Nicotinamide metabolic process</b><br><i>TALDO1, IDH1, MDH2, G6PD</i>                                          | 1.59E-06     |
| <b>Regulation of cellular component organization</b><br><i>HMGB1, DPP4, ACTN4, LGALS1, MAP4, TPM1, RAB5C, FN1</i> | 3.64E-05     |
| <b>Cellular response to chemical stimulus</b><br><i>HMGB1, STAT1, LGALS1, TPM1, G6PD, VCP, CRYZ</i>               | 4.26E-05     |
| <b>Protein transport</b><br><i>SEC23A, ACTN4, RAB5C, VCP, HSPA9, HMGB1, DPP4, VCL, TPM1, YWHAE, FN1, CALD1</i>    | 1.26E-04     |
| <b>Regulation of apoptosis</b><br><i>HMGB1, TPM1, VCP</i>                                                         | 6.03E-04     |

| BINGO GO Biological Process - Downregulated                                                                                                                                                           | Corr p-value |
|-------------------------------------------------------------------------------------------------------------------------------------------------------------------------------------------------------|--------------|
| <b>Translation</b><br><i>RPL6, RPL19, RPL14, RPL13, RPL13A, RPL4, RPLP0, RSL1D1, NACA, NARS</i>                                                                                                       | 5.14E-09     |
| <b>Protein metabolic process</b><br><i>USP14, NACA, PLOD2, P4HA2, RUVBL1, PSMA5, RPL6, RPL19, RPL14, RPL13, RPL13A, RPL4, RPLP0, RSL1D1, NCEH1, TGM2, VCP, PSMC2, CNDP2, MCM6, NACA, NARS, SPTBN1</i> | 2.14E-07     |
| <b>Glycolysis</b><br><i>ENO1, TPI1, PFKP, PGAM1</i>                                                                                                                                                   | 2,16E-04     |
