# Supplementary material for: HIF prolyl hydroxylase PHD3 regulates translational machinery and glucose metabolism in clear cell renal cell carcinoma
Source: PubMed Central journal article supplement (PMC5496173; doi:10.1186/s40170-017-0167-y), 2017-07-04

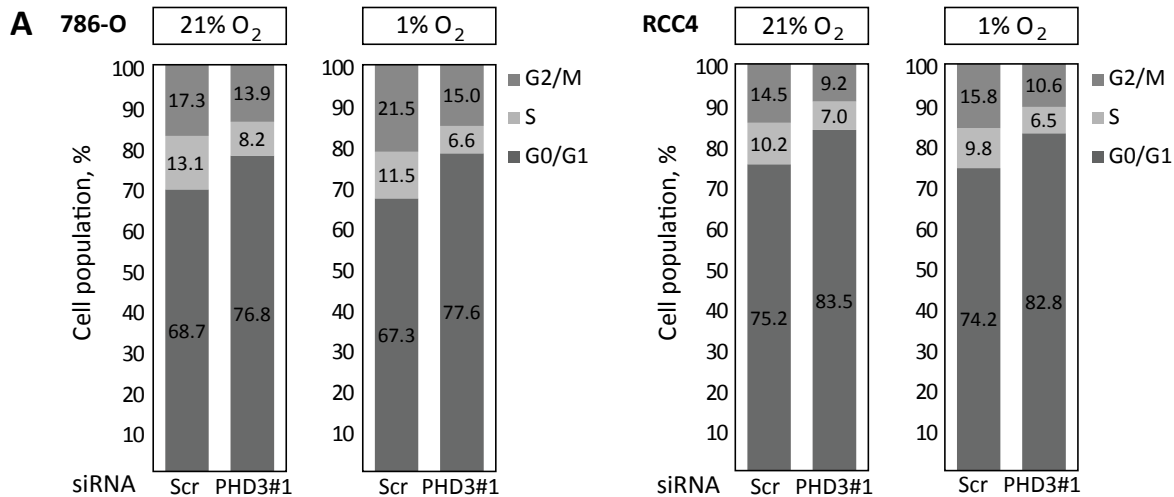

|       | 21% O <sub>2</sub> |      |        |         | 1% O <sub>2</sub> |      |        |         |
|-------|--------------------|------|--------|---------|-------------------|------|--------|---------|
|       | Scr                | SEM  | siPHD3 | SEM     | Scr               | SEM  | siPHD3 | SEM     |
| G2/M  | 17.3               | 1.27 | 13.9   | * 2.22  | 21.5              | 1.45 | 15.0   | * 2.54  |
| S     | 13.1               | 1.69 | 8.2    | ** 2.09 | 11.5              | 0.79 | 6.6    | ** 1.40 |
| G0/G1 | 68.7               | 1.39 | 76.8   | ** 3.71 | 67.3              | 0.98 | 77.6   | * 3.26  |

|       | 21% O <sub>2</sub> |      |        |                      | 1% O <sub>2</sub> |      |        |         |
|-------|--------------------|------|--------|----------------------|-------------------|------|--------|---------|
|       | Scr                | SEM  | siPHD3 | SEM                  | Scr               | SEM  | siPHD3 | SEM     |
| G2/M  | 14.5               | 1.71 | 9.2    | <sup>n.s.</sup> 1.31 | 15.8              | 1.20 | 10.6   | * 1.48  |
| S     | 10.2               | 1.76 | 7.0    | * 1.91               | 9.8               | 1.95 | 6.6    | * 1.16  |
| G0/G1 | 75.2               | 3.24 | 83.5   | * 3.12               | 74.2              | 2.90 | 82.8   | ** 2.46 |

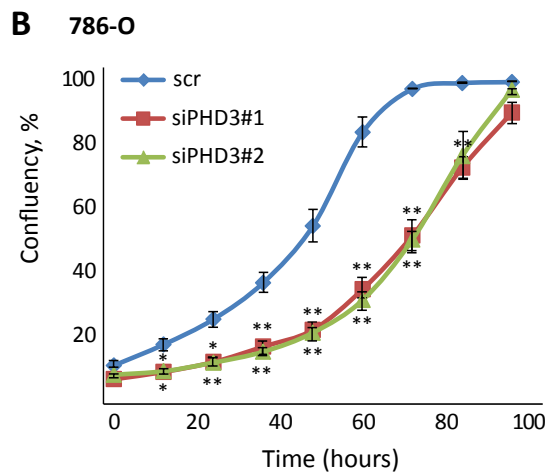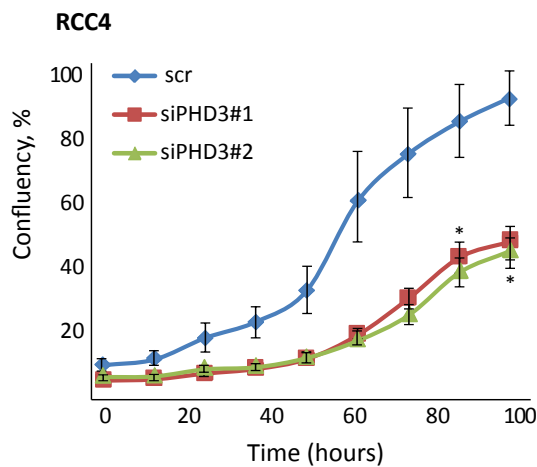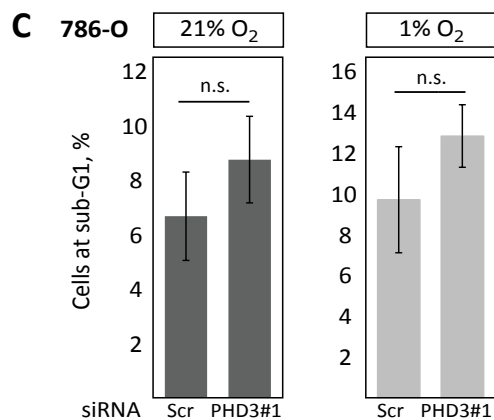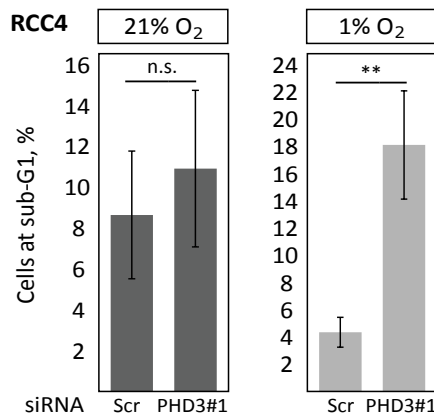

Supplement: 40170_2017_167_MOESM3_ESM.pdf [file 40170_2017_167_MOESM3_ESM.pdf]
